# Supplementary material for: Reconstruction of past distribution for the Mongolian toad, Strauchbufo raddei (Anura: Bufonidae) using environmental modeling
Source: PeerJ journal article supplement (doi:10.7717/peerj.9216), 2020-06-05
Supplement: Supplementary_table_S4.pdf [file Supplementary_table_S4.pdf]

**Table S4.** Performance metrics for parameter settings used for creating the present time model and relative contribution (%) of variables.

| <b>Variable</b>                              | <b>Value</b> |
|----------------------------------------------|--------------|
| Partial ROC                                  | 0            |
| Omission rate 5%                             | 0.039        |
| AICc                                         | 12685        |
| Delta AICc                                   | 0            |
| Annual mean temperature (Bio1 )              | 16.6         |
| Mean diurnal range (Bio 2)                   | 0.5          |
| Isothermality (Bio 3)                        | 2.0          |
| Temperature seasonality (Bio 4)              | 14.8         |
| Maximum temperature of warmest month (Bio 5) | 7.2          |
| Precipitation seasonality (Bio 15)           | 20.9         |
| Precipitation of wettest quarter (Bio 16)    | 1.8          |
| Precipitation of coldest quarter (Bio 19)    | 11.0         |
| Broadleaf forest                             | 0.6          |
| Needleleaf forest                            | 0.7          |
| Mixed forest                                 | 1.5          |
| Shrubs                                       | 0.9          |
| Barren                                       | 3.0          |
| Herbaceous vegetation                        | 5.1          |
| Cultivated vegetation                        | 3.0          |
| Altitude                                     | 2.4          |
| Aridity index                                | 1.0          |
| Aspect                                       | 0.2          |
| Exposition                                   | 0.1          |
| Habitat homogeneity                          | 1.7          |
| Slope                                        | 0.7          |
| Terrain roughness index                      | 0.3          |
| Tree coverage percent                        | 3.9          |
