# Supplementary material for: Reconstruction of past distribution for the Mongolian toad, Strauchbufo raddei (Anura: Bufonidae) using environmental modeling
Source: PeerJ journal article supplement (doi:10.7717/peerj.9216), 2020-06-05
Supplement: Supplementary_table_S7.pdf [file Supplementary_table_S7.pdf]

**Table S7.** The climatic parameters for localities of *Strauchbufo raddei*. Present time localities (n = 713). Pleistocene (Europe) is the mid-Pleistocene European fossil records (n = 6). Pleistocene (Mongolia) is undetermined toads from Mongolia (n = 1). Significant differences ( $p < 0.05$ ) between current and the mid-Pleistocene (for European fossil records) climatic parameters are underlined.

| Bioclimatic variables                    | Present time     |            | Pleistocene (Europe) |             | Pleistocene (Mongolia) | Sheffe test (df = 717) |            |
|------------------------------------------|------------------|------------|----------------------|-------------|------------------------|------------------------|------------|
|                                          | Mean $\pm$ SD    | Range      | Mean $\pm$ SD        | Range       |                        | p-value                | Error (MS) |
| Annual mean temperature (°C)             | 2.0 $\pm$ 3.1    | -8.7-15.2  | 7.1 $\pm$ 0.7        | 6.2-8.0     | 0.6                    | <u>0.00007</u>         | 944.5      |
| Temperature seasonality (CV)             | 13668 $\pm$ 1418 | 8343-17053 | 12395 $\pm$ 552      | 11602-13024 | 18574                  | <u>0.02827</u>         | 1999000.0  |
| Mean temperature of wettest quarter (°C) | 19.1 $\pm$ 2.4   | 3.2-26.7   | 21.4 $\pm$ 0.5       | 20.8-22.2   | 23.4                   | <u>0.02069</u>         | 589.6      |
| Mean temperature of driest quarter (°C)  | -14.8 $\pm$ 4.7  | -23.9-1.4  | -2.3 $\pm$ 2.1       | -5.1-0.3    | -17.8                  | <u>0</u>               | 2199.5     |
| Mean temperature of warmest quarter (°C) | 19.6 $\pm$ 2.3   | 3.2-27.4   | 22.9 $\pm$ 0.5       | 22.3-23.7   | 23.4                   | <u>0.00072</u>         | 529.6      |
| Mean temperature of coldest quarter (°C) | -17.8 $\pm$ 4.6  | -27.1-1.4  | -7.0 $\pm$ 1.3       | -8.3--5.5   | -22.0                  | <u>0</u>               | 2116.6     |
| Annual precipitation (mm)                | 346 $\pm$ 191    | 41-1299    | 531 $\pm$ 39         | 478-596     | 112                    | <u>0.01780</u>         | 36088.0    |
| Precipitation of wettest month (mm)      | 88 $\pm$ 42      | 14-393     | 55 $\pm$ 4           | 50-61       | 29                     | 0.05394                | 1777.3     |
| Precipitation of driest month (mm)       | 4 $\pm$ 4        | 0-22       | 25 $\pm$ 3           | 21-30       | 0                      | <u>0</u>               | 13.8       |
| Precipitation seasonality (CV)           | 103 $\pm$ 15     | 41-132     | 21 $\pm$ 1           | 20-23       | 89                     | <u>0</u>               | 237.7      |
| Precipitation of wettest quarter (mm)    | 243 $\pm$ 118    | 35-1031    | 155 $\pm$ 12         | 142-177     | 68                     | 0.06947                | 13962.0    |
| Precipitation of driest quarter (mm)     | 12 $\pm$ 12      | 0-67       | 91 $\pm$ 8           | 81-104      | 2                      | <u>0</u>               | 140.2      |
| Precipitation of warmest quarter (mm)    | 228 $\pm$ 114    | 35-1031    | 150 $\pm$ 13         | 137-173     | 68                     | 0.09150                | 12837.0    |
| Precipitation of coldest quarter (mm)    | 16 $\pm$ 14      | 0-87       | 118 $\pm$ 10         | 103-131     | 4                      | <u>0</u>               | 200.4      |
